# Supplementary material for: Minichromosome maintenance proteins in lung adenocarcinoma: Clinical significance and therapeutic targets
Source: PubMed Central journal article supplement (PMC10476565; doi:10.1002/2211-5463.13681), 2023-08-07
Supplement: FEB4-13-1737-s001.pdf [file FEB4-13-1737-s001.pdf]

**Table S7. Candidate tumor-suppressive miRNAs binding to *MCM7*.**

| MicroRNA                | miRBase accession No. | Log <sub>2</sub> fold change<br>GSE230229 | Normalized read count<br>GSE230229 |                     | FDR<br>GSE230229 | <i>p</i> value<br>GSE230229 |
|-------------------------|-----------------------|-------------------------------------------|------------------------------------|---------------------|------------------|-----------------------------|
|                         |                       |                                           | LUAD tissues                       | Normal lung tissues |                  |                             |
| <i>hsa-miR-519a-3p</i>  | MIMAT0002869          | -2.90                                     | 0.00                               | 2.90                | 0.012            | 0.002                       |
| <i>hsa-miR-486-3p</i>   | MIMAT0004762          | -2.86                                     | 5.44                               | 8.30                | 0.016            | 0.003                       |
| <i>hsa-miR-34b-5p</i>   | MIMAT0000685          | -2.73                                     | 9.78                               | 12.52               | 0.175            | 0.046                       |
| <i>hsa-miR-6768-5p</i>  | MIMAT0027436          | -2.13                                     | 4.12                               | 6.25                | 0.076            | 0.016                       |
| <i>hsa-miR-373-3p</i>   | MIMAT0000726          | -2.09                                     | 0.00                               | 2.09                | 0.152            | 0.038                       |
| <i>hsa-miR-30c-2-3p</i> | MIMAT0004550          | -1.92                                     | 8.27                               | 10.19               | 0.119            | 0.027                       |
| <i>hsa-miR-218-5p</i>   | MIMAT0000275          | -1.65                                     | 12.92                              | 14.57               | 0.103            | 0.023                       |
| <i>hsa-miR-1-5p</i>     | MIMAT0031892          | -1.62                                     | 3.76                               | 5.37                | 0.047            | 0.009                       |
| <i>hsa-miR-3613-3p</i>  | MIMAT0017991          | -1.25                                     | 5.14                               | 6.40                | 0.016            | 0.003                       |
| <i>hsa-miR-548h-3p</i>  | MIMAT0022723          | -1.01                                     | 8.04                               | 9.04                | 0.180            | 0.047                       |
| <i>hsa-miR-203b-5p</i>  | MIMAT0019813          | -0.82                                     | 8.79                               | 9.61                | 0.148            | 0.036                       |

LUAD: lung adenocarcinoma

FDR: false discovery rate
