# Supplementary material for: Minichromosome maintenance proteins in lung adenocarcinoma: Clinical significance and therapeutic targets
Source: PubMed Central journal article supplement (PMC10476565; doi:10.1002/2211-5463.13681), 2023-08-07
Supplement: FEB4-13-1737-s002.pdf [file FEB4-13-1737-s002.pdf]

**Table S6. Candidate tumor-suppressive miRNAs binding to *MCM6*.**

| MicroRNA                | miRBase accession No. | Log <sub>2</sub> fold change<br>GSE230229 | Normalized read count<br>GSE230229 |                     | FDR<br>GSE230229 | <i>p</i> value<br>GSE230229 |
|-------------------------|-----------------------|-------------------------------------------|------------------------------------|---------------------|------------------|-----------------------------|
|                         |                       |                                           | LUAD tissues                       | Normal lung tissues |                  |                             |
| <i>hsa-miR-551b-5p</i>  | MIMAT0004794          | -3.39                                     | 1.03                               | 4.42                | 0.022            | 0.004                       |
| <i>hsa-miR-218-1-3p</i> | MIMAT0004565          | -3.07                                     | 1.05                               | 4.12                | 0.061            | 0.012                       |
| <i>hsa-miR-6813-3p</i>  | MIMAT0027527          | -2.65                                     | 0.00                               | 2.65                | 0.007            | 0.001                       |
| <i>hsa-miR-6768-5p</i>  | MIMAT0027436          | -2.13                                     | 4.12                               | 6.25                | 0.076            | 0.016                       |
| <i>hsa-miR-373-3p</i>   | MIMAT0000726          | -2.09                                     | 0.00                               | 2.09                | 0.152            | 0.038                       |
| <i>hsa-miR-144-3p</i>   | MIMAT0000436          | -2.06                                     | 10.85                              | 12.91               | 0.107            | 0.024                       |
| <i>hsa-miR-30c-2-3p</i> | MIMAT0004550          | -1.92                                     | 8.27                               | 10.19               | 0.119            | 0.027                       |
| <i>hsa-miR-1-5p</i>     | MIMAT0031892          | -1.62                                     | 3.76                               | 5.37                | 0.047            | 0.009                       |
| <i>hsa-miR-145-3p</i>   | MIMAT0004601          | -1.24                                     | 11.26                              | 12.50               | 0.157            | 0.039                       |
| <i>hsa-miR-548ao-5p</i> | MIMAT0021029          | -1.12                                     | 4.55                               | 5.67                | 0.003            | <0.001                      |
| <i>hsa-miR-484</i>      | MIMAT0002174          | -1.04                                     | 7.73                               | 8.77                | 0.055            | 0.011                       |
| <i>hsa-miR-2110</i>     | MIMAT0010133          | -0.69                                     | 6.91                               | 7.59                | 0.141            | 0.034                       |

LUAD: lung adenocarcinoma

FDR: false discovery rate
