# Supplementary material for: Minichromosome maintenance proteins in lung adenocarcinoma: Clinical significance and therapeutic targets
Source: PubMed Central journal article supplement (PMC10476565; doi:10.1002/2211-5463.13681), 2023-08-07
Supplement: FEB4-13-1737-s003.pdf [file FEB4-13-1737-s003.pdf]

**Table S4. Candidate tumor-suppressive miRNAs binding to *MCM4*.**

| MicroRNA                | miRBase accession No. | Log <sub>2</sub> fold change<br>GSE230229 | Normalized read count<br>GSE230229 |                     | FDR<br>GSE230229 | <i>p</i> value<br>GSE230229 |
|-------------------------|-----------------------|-------------------------------------------|------------------------------------|---------------------|------------------|-----------------------------|
|                         |                       |                                           | LUAD tissues                       | Normal lung tissues |                  |                             |
| <i>hsa-miR-4795-3p</i>  | MIMAT0019969          | -2.95                                     | 0.00                               | 2.95                | <0.001           | <0.001                      |
| <i>hsa-miR-1208</i>     | MIMAT0005873          | -2.95                                     | 0.00                               | 2.95                | 0.002            | <0.001                      |
| <i>hsa-miR-603</i>      | MIMAT0003271          | -2.90                                     | 0.00                               | 2.90                | <0.001           | <0.001                      |
| <i>hsa-miR-1258</i>     | MIMAT0005909          | -2.31                                     | 1.36                               | 3.67                | 0.158            | 0.040                       |
| <i>hsa-miR-4529-5p</i>  | MIMAT0019236          | -2.22                                     | 1.15                               | 3.37                | 0.120            | 0.028                       |
| <i>hsa-miR-6768-5p</i>  | MIMAT0027436          | -2.13                                     | 4.12                               | 6.25                | 0.076            | 0.016                       |
| <i>hsa-miR-3622a-5p</i> | MIMAT0018003          | -2.12                                     | 0.95                               | 3.07                | 0.141            | 0.034                       |
| <i>hsa-miR-373-3p</i>   | MIMAT0000726          | -2.09                                     | 0.00                               | 2.09                | 0.152            | 0.038                       |
| <i>hsa-miR-144-3p</i>   | MIMAT0000436          | -2.06                                     | 10.85                              | 12.91               | 0.107            | 0.024                       |
| <i>hsa-miR-584-5p</i>   | MIMAT0003249          | -1.79                                     | 5.73                               | 7.52                | 0.008            | 0.001                       |
| <i>hsa-miR-4524a-3p</i> | MIMAT0019063          | -1.59                                     | 4.16                               | 5.76                | 0.064            | 0.013                       |
| <i>hsa-miR-139-5p</i>   | MIMAT0000250          | -1.59                                     | 7.51                               | 9.11                | 0.078            | 0.016                       |
| <i>hsa-miR-4705</i>     | MIMAT0019805          | -1.40                                     | 5.72                               | 7.11                | 0.112            | 0.025                       |
| <i>hsa-miR-4516</i>     | MIMAT0019053          | -1.38                                     | 3.56                               | 4.94                | 0.164            | 0.042                       |
| <i>hsa-miR-126-5p</i>   | MIMAT0000444          | -1.31                                     | 16.10                              | 17.41               | 0.142            | 0.034                       |
| <i>hsa-miR-143-3p</i>   | MIMAT0000435          | -1.27                                     | 17.97                              | 19.24               | 0.084            | 0.018                       |
| <i>hsa-miR-3613-3p</i>  | MIMAT0017991          | -1.25                                     | 5.14                               | 6.40                | 0.016            | 0.003                       |
| <i>hsa-miR-145-3p</i>   | MIMAT0004601          | -1.24                                     | 11.26                              | 12.50               | 0.157            | 0.039                       |
| <i>hsa-miR-143-5p</i>   | MIMAT0004599          | -1.14                                     | 11.48                              | 12.62               | 0.172            | 0.044                       |
| <i>hsa-miR-150-3p</i>   | MIMAT0004610          | -1.10                                     | 3.95                               | 5.05                | 0.087            | 0.018                       |
| <i>hsa-miR-548h-3p</i>  | MIMAT0022723          | -1.01                                     | 8.04                               | 9.04                | 0.180            | 0.047                       |
| <i>hsa-miR-1273h-3p</i> | MIMAT0030416          | -0.96                                     | 3.93                               | 4.89                | 0.144            | 0.035                       |
| <i>hsa-miR-6872-3p</i>  | MIMAT0027645          | -0.87                                     | 7.07                               | 7.93                | 0.022            | 0.004                       |
| <i>hsa-miR-203b-5p</i>  | MIMAT0019813          | -0.82                                     | 8.79                               | 9.61                | 0.148            | 0.036                       |
| <i>hsa-miR-378a-5p</i>  | MIMAT0000731          | -0.80                                     | 8.58                               | 9.38                | 0.010            | 0.002                       |

LUAD: lung adenocarcinoma

FDR: false discovery rate
