# Supplementary material for: Minichromosome maintenance proteins in lung adenocarcinoma: Clinical significance and therapeutic targets
Source: PubMed Central journal article supplement (PMC10476565; doi:10.1002/2211-5463.13681), 2023-08-07
Supplement: FEB4-13-1737-s006.pdf [file FEB4-13-1737-s006.pdf]

**Table S2: Characteristics of the patients used for IHC.**

| No. | Age | Sex | T  | N | M | Pathological stage | Type               |
|-----|-----|-----|----|---|---|--------------------|--------------------|
| 1   | 64  | F   | 2  | 1 | 0 | IIA                | LUAD               |
| 2   | 54  | F   | 2  | 1 | 0 | IIA                | LUAD               |
| 3   | 50  | F   | 2  | 0 | 0 | IB                 | LUAD               |
| 4   | 70  | M   | 1  | 0 | 0 | IA                 | LUAD               |
| 5   | 65  | F   | 2  | 2 | 0 | IIIA               | LUAD               |
| 6   | 55  | M   | 2  | 0 | 0 | IB                 | LUAD               |
| 7   | 56  | F   | 1b | 0 | 0 | IA                 | LUAD               |
| 8   | 77  | M   | 3  | 0 | 0 | IIB                | LUAD               |
| 9   | 62  | M   | 2a | 0 | 0 | IB                 | LUAD               |
| 10  | 71  | F   | 2  | 1 | 0 | IIA                | LUAD               |
| 11  | 35  | F   | 2  | 1 | 0 | IIA                | LUAD               |
| 12  | 59  | M   | 4  | 3 | 0 | IIIB               | LUAD               |
| 13  | 43  | F   | 2  | 2 | 0 | IIIA               | LUAD               |
| 14  | 58  | M   | 1  | 0 | 0 | IA                 | LUAD               |
| 15  | 43  | M   | 2a | 0 | 0 | IB                 | LUAD               |
| 16  | 49  | F   | 2  | 1 | 0 | IIA                | LUAD               |
| 17  | 75  | M   | 2  | 0 | 0 | IB                 | LUAD               |
| 18  | 65  | M   | 2  | 2 | 0 | IIIA               | LUAD               |
| 19  | 53  | M   | 2  | 0 | 0 | IB                 | LUAD               |
| 20  | 67  | M   | 2  | 0 | 0 | IB                 | LUAD               |
| 21  | 57  | M   | 2  | 0 | 0 | IB                 | LUAD               |
| 22  | 82  | M   | 4  | 1 | 0 | IIIA               | LUAD               |
| 23  | 52  | F   | 3  | 1 | 0 | IIIA               | LUAD               |
| 24  | 60  | F   | 2  | 0 | 0 | IB                 | LUAD               |
| 25  | 54  | M   | 3  | 1 | 0 | IIIA               | LUAD               |
| 26  | 47  | M   | 2  | 0 | 0 | IB                 | LUAD               |
| 27  | 57  | F   | 2  | 0 | 0 | IB                 | LUAD               |
| 28  | 56  | F   | 2  | 0 | 0 | IB                 | LUAD               |
| 29  | 56  | F   | 2  | 1 | 0 | IIA                | LUAD               |
| 30  | 67  | M   | 2  | 0 | 0 | IB                 | LUAD               |
| 31  | 50  | F   | 2  | 0 | 0 | IB                 | LUAD               |
| 32  | 48  | F   | 2  | 0 | 0 | IB                 | LUAD               |
| 33  | 67  | M   | 2  | 1 | 0 | IIA                | LUAD               |
| 34  | 75  | F   | 2  | 1 | 0 | IIA                | LUAD               |
| 71  | 40  | F   | -  | - | - | -                  | normal lung tissue |
| 72  | 23  | M   | -  | - | - | -                  | normal lung tissue |
| 73  | 33  | M   | -  | - | - | -                  | normal lung tissue |
| 74  | 30  | M   | -  | - | - | -                  | normal lung tissue |
| 75  | 16  | F   | -  | - | - | -                  | normal lung tissue |
| 76  | 30  | M   | -  | - | - | -                  | normal lung tissue |
| 77  | 21  | F   | -  | - | - | -                  | normal lung tissue |
| 78  | 2   | F   | -  | - | - | -                  | normal lung tissue |
| 79  | 24  | M   | -  | - | - | -                  | normal lung tissue |
| 80  | 48  | M   | -  | - | - | -                  | normal lung tissue |

IHC: immunohistochemistry.

LUAD: lung adenocarcinoma.
