# Supplementary material for: Minichromosome maintenance proteins in lung adenocarcinoma: Clinical significance and therapeutic targets
Source: PubMed Central journal article supplement (PMC10476565; doi:10.1002/2211-5463.13681), 2023-08-07
Supplement: FEB4-13-1737-s008.pdf [file FEB4-13-1737-s008.pdf]

**Table S1. Reagents used in this study.**

| Probe                        | Assay ID                | Company                                              |                                             |
|------------------------------|-------------------------|------------------------------------------------------|---------------------------------------------|
| <i>MCM2</i>                  | Hs01091564_m1           | Applied Biosystem (Foster City, CA, USA)             |                                             |
| <i>MCM3</i>                  | Hs00172459_m1           | Applied Biosystem                                    |                                             |
| <i>MCM4</i>                  | Hs00908398_m1           | Applied Biosystem                                    |                                             |
| <i>MCM5</i>                  | Hs01052148_m1           | Applied Biosystem                                    |                                             |
| <i>MCM6</i>                  | Hs00962418_m1           | Applied Biosystem                                    |                                             |
| <i>MCM7</i>                  | Hs00428518_m1           | Applied Biosystem                                    |                                             |
| <i>GAPDH</i>                 | Hs99999905_m1           | Applied Biosystem                                    |                                             |
| siRNA                        | Concentration           | Catalog number<br>primer name or sequence (5' to 3') | Company                                     |
| si- <i>MCM2</i>              | 10nM                    | Cat#10620312<br>HSS106390, HSS181044                 | Invitrogen (Carlsbad, CA, USA)              |
| si- <i>MCM3</i>              | 10nM                    | Cat#10620312<br>HSS181045, GAACCUACCGUUGCCUCCUGGAAA  | Invitrogen                                  |
| si- <i>MCM4</i>              | 10nM                    | Cat#10620312<br>HSS106396, HSS106398                 | Invitrogen                                  |
| si- <i>MCM5</i>              | 10nM                    | Cat#10620312<br>HSS181047, GAGUGCUCGGUUUCUUCUCUGUU   | Invitrogen                                  |
| si- <i>MCM6</i>              | 10nM                    | Cat#10620312<br>HSS106403, HSS106404                 | Invitrogen                                  |
| si- <i>MCM7</i>              | 10nM                    | Cat#10620312<br>HSS106405, HSS181048                 | Invitrogen                                  |
| Antibody                     | Dilution                | Catalog number                                       | Company                                     |
| <i>MCM2</i>                  | WB 1:1000<br>IHC 1:1000 | ab4461                                               | Abcam (Cambridge, UK)                       |
| p <i>MCM2</i>                | WB 1:1000               | ab133243                                             | Abcam                                       |
| <i>MCM3</i>                  | WB 1:1000<br>IHC 1:100  | ab128923                                             | Abcam                                       |
| <i>MCM4</i>                  | WB 1:2000<br>IHC 1:1000 | ab4459                                               | Abcam                                       |
| <i>MCM5</i>                  | WB 1:1000<br>IHC 1:50   | ab75975                                              | Abcam                                       |
| <i>MCM6</i>                  | WB 1:2000<br>IHC 1:100  | ab4458                                               | Abcam                                       |
| <i>MCM7</i>                  | WB 1:1000<br>IHC 1:1000 | ab2360                                               | Abcam                                       |
| CDC7                         | WB 1:500                | ab229187                                             | Abcam                                       |
| <i>GAPDH</i>                 | WB 1:20000              | MAB374                                               | EMD Millipore (Billerica, MA, USA)          |
| Inhibitor                    |                         | catalog number                                       | company                                     |
| TAK-931 (simurosertib)       |                         | HY-100888                                            | MedChemExpress (Monmouth Junction, NJ, USA) |
| miRNA                        | Concentration           | Catalog number / Assay ID                            | company                                     |
| <i>miR-139-3p</i>            | 10nM                    | AM17100 / PM25489                                    | Invitrogen                                  |
| <i>miR-378a-5p</i>           | 10nM                    | AM17100 / PM10049                                    | Invitrogen                                  |
| <i>miR-2110</i>              | 10nM                    | AM17100 / PM14979                                    | Invitrogen                                  |
| anti-miR Negative Control #1 | 10nM                    | AM17100 / -                                          | Invitrogen                                  |
