# Supplementary material for: Minichromosome maintenance proteins in lung adenocarcinoma: Clinical significance and therapeutic targets
Source: PubMed Central journal article supplement (PMC10476565; doi:10.1002/2211-5463.13681), 2023-08-07
Supplement: FEB4-13-1737-s011.pdf [file FEB4-13-1737-s011.pdf]

**Table S5. Candidate tumor-suppressive miRNAs binding to *MCM5*.**

| MicroRNA                | miRBase accession No. | Log <sub>2</sub> fold change<br>GSE230229 | Normalized read count<br>GSE230229 |                     | FDR<br>GSE230229 | p value<br>GSE230229 |
|-------------------------|-----------------------|-------------------------------------------|------------------------------------|---------------------|------------------|----------------------|
|                         |                       |                                           | LUAD tissues                       | Normal lung tissues |                  |                      |
| <i>hsa-miR-551b-5p</i>  | MIMAT0004794          | -3.39                                     | 1.03                               | 4.42                | 0.022            | 0.004                |
| <i>hsa-miR-4703-3p</i>  | MIMAT0019802          | -3.15                                     | 0.00                               | 3.15                | <0.001           | <0.001               |
| <i>hsa-miR-4795-3p</i>  | MIMAT0019969          | -2.95                                     | 0.00                               | 2.95                | <0.001           | <0.001               |
| <i>hsa-miR-1208</i>     | MIMAT0005873          | -2.95                                     | 0.00                               | 2.95                | 0.002            | <0.001               |
| <i>hsa-miR-603</i>      | MIMAT0003271          | -2.90                                     | 0.00                               | 2.90                | <0.001           | <0.001               |
| <i>hsa-miR-486-3p</i>   | MIMAT0004762          | -2.86                                     | 5.44                               | 8.30                | 0.016            | 0.003                |
| <i>hsa-miR-34b-5p</i>   | MIMAT0000685          | -2.73                                     | 9.78                               | 12.52               | 0.175            | 0.046                |
| <i>hsa-miR-4532</i>     | MIMAT0019071          | -2.70                                     | 8.57                               | 11.26               | 0.106            | 0.024                |
| <i>hsa-miR-6813-3p</i>  | MIMAT0027527          | -2.65                                     | 0.00                               | 2.65                | 0.007            | 0.001                |
| <i>hsa-miR-940</i>      | MIMAT0004983          | -2.63                                     | 1.30                               | 3.92                | 0.127            | 0.030                |
| <i>hsa-miR-371b-3p</i>  | MIMAT0019893          | -2.50                                     | 1.49                               | 3.99                | 0.178            | 0.047                |
| <i>hsa-miR-4483</i>     | MIMAT0019017          | -2.36                                     | 3.36                               | 5.72                | 0.141            | 0.034                |
| <i>hsa-miR-4529-5p</i>  | MIMAT0019236          | -2.22                                     | 1.15                               | 3.37                | 0.120            | 0.028                |
| <i>hsa-miR-144-3p</i>   | MIMAT0000436          | -2.06                                     | 10.85                              | 12.91               | 0.107            | 0.024                |
| <i>hsa-miR-138-5p</i>   | MIMAT0000430          | -1.63                                     | 9.35                               | 10.98               | 0.104            | 0.023                |
| <i>hsa-miR-1-3p</i>     | MIMAT0000416          | -1.60                                     | 11.03                              | 12.63               | 0.184            | 0.049                |
| <i>hsa-miR-139-5p</i>   | MIMAT0000250          | -1.59                                     | 7.51                               | 9.11                | 0.078            | 0.016                |
| <i>hsa-miR-145-5p</i>   | MIMAT0000437          | -1.44                                     | 14.95                              | 16.39               | 0.159            | 0.040                |
| <i>hsa-miR-451b</i>     | MIMAT0019840          | -1.39                                     | 4.03                               | 5.41                | 0.109            | 0.025                |
| <i>hsa-miR-4516</i>     | MIMAT0019053          | -1.38                                     | 3.56                               | 4.94                | 0.164            | 0.042                |
| <i>hsa-miR-126-5p</i>   | MIMAT0000444          | -1.31                                     | 16.10                              | 17.41               | 0.142            | 0.034                |
| <i>hsa-miR-887-3p</i>   | MIMAT0004951          | -1.31                                     | 6.25                               | 7.56                | 0.006            | 0.001                |
| <i>hsa-miR-143-3p</i>   | MIMAT0000435          | -1.27                                     | 17.97                              | 19.24               | 0.084            | 0.018                |
| <i>hsa-miR-548ao-5p</i> | MIMAT0021029          | -1.12                                     | 4.55                               | 5.67                | 0.003            | 0.000                |
| <i>hsa-miR-484</i>      | MIMAT0002174          | -1.04                                     | 7.73                               | 8.77                | 0.055            | 0.011                |
| <i>hsa-miR-548h-3p</i>  | MIMAT0022723          | -1.01                                     | 8.04                               | 9.04                | 0.180            | 0.047                |
| <i>hsa-miR-203b-5p</i>  | MIMAT0019813          | -0.82                                     | 8.79                               | 9.61                | 0.148            | 0.036                |
| <i>hsa-miR-2110</i>     | MIMAT0010133          | -0.69                                     | 6.91                               | 7.59                | 0.141            | 0.034                |

LUAD: lung adenocarcinoma

FDR: false discovery rate
