# Supplementary material for: Minichromosome maintenance proteins in lung adenocarcinoma: Clinical significance and therapeutic targets
Source: PubMed Central journal article supplement (PMC10476565; doi:10.1002/2211-5463.13681), 2023-08-07
Supplement: FEB4-13-1737-s013.pdf [file FEB4-13-1737-s013.pdf]

**Table S3. Candidate tumor-suppressive miRNAs binding to *MCM3*.**

| MicroRNA               | miRBase accession No. | Log <sub>2</sub> fold change<br>GSE230229 | Normalized read count<br>GSE230229 |                     | FDR<br>GSE230229 | <i>p</i> value<br>GSE230229 |
|------------------------|-----------------------|-------------------------------------------|------------------------------------|---------------------|------------------|-----------------------------|
|                        |                       |                                           | LUAD tissues                       | Normal lung tissues |                  |                             |
| <i>hsa-miR-1208</i>    | MIMAT0005873          | -2.95                                     | 0.00                               | 2.95                | 0.002            | <0.001                      |
| <i>hsa-miR-516b-5p</i> | MIMAT0002859          | -2.50                                     | 1.12                               | 3.62                | 0.100            | 0.022                       |
| <i>hsa-miR-373-3p</i>  | MIMAT0000726          | -2.09                                     | 0.00                               | 2.09                | 0.152            | 0.038                       |
| <i>hsa-miR-4516</i>    | MIMAT0019053          | -1.38                                     | 3.56                               | 4.94                | 0.164            | 0.042                       |
| <i>hsa-miR-3613-3p</i> | MIMAT0017991          | -1.25                                     | 5.14                               | 6.40                | 0.016            | 0.003                       |

LUAD: lung adenocarcinoma

FDR: false discovery rate
